# Supplementary material for: Effect of lyocell fiber cross-sectional shape on structure and properties of lyocell/PLA composites
Source: publisher site journal article supplement (doi:10.1515/polyeng-2022-0070), 2022-07-19
Supplement: Supplementary file 1 [file j_polyeng-2022-0070_suppl.docx]

**Supplementary Material**

Effect of Lyocell fiber cross-sectional shape on structure and properties of Lyocell/PLA composites

Yang Shen et al.

DOI 10.1515/polyeng-2022-0070

Preparation of Lyocell fibers

Cellulose softwood pulp (DP = 547, α-cellulose content 88%) was supplied by Weyerhaeuser Co., USA. NMMO aqueous solution with an initial water content of 50 wt% was purchased from Amines & Plasticizers Co., Ltd., India. The antioxidant, *n*-propyl gallate, reagent grade, was provided by Shanghai Chemical Co., China.

The 50 wt% NMMO aqueous solution and a small amount of antioxidant (*n*-propyl gallate) were mixed and then distilled at 70-100 oC under vacuum to remove water, in order to obtain a 74 wt% NMMO solution. Then the dried cellulose pulp and 74 wt% NMMO solution were mixed in the dissolving tank, and the mixture was then stirred at 90℃ under vacuum to further distill water. At last, a homogeneous cellulose/NMMO/H2O spinning dope with a cellulose content of 13 wt % was obtained.

The 90°C cellulose/NMMO/H2O spinning dope was extruded by a gear pump with a pump flux of 16 g/min and then through a spinneret with 36 orifices. Three types of spinnerets were used to prepare Lyocell fibers with different cross-section shapes. The cross-sectional shapes of the nozzle holes in each spinneret are illustrated in Supplementary Figure 1. The spinning solution was passed through an air gap of 50 mm in length and immersed in water, and then taken-up at spinning speed of 90 m/min. Then the fibers were washed with water and dried in air to obtain Lyocell fibers.


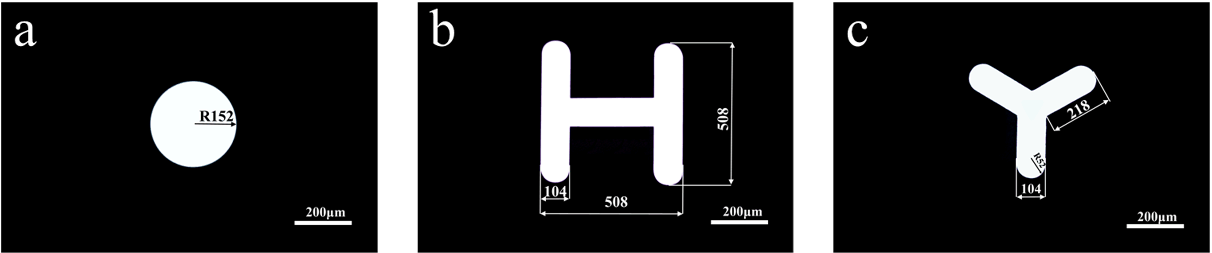


**Supplementary Figure S1:** Cross-sectional shapes of the nozzle holes in the spinnerets.Reproduced with permission [1]. Copyright 2021, Springer Nature.

Calculation of non-roundness factor of Lyocell fibers

Lyocell fibers were wrapped with collodion and then the fiber slices were prepared using a Hastelon slicer. Cross-sections of Lyocell fibers slices were observed by an XP-500 optical microscope (Shanghai Caikang Optical Instrument Co., Ltd., China). Then the perimeters and areas of cross-section of different shaped Lyocell fibers were measured using Image J Image processing software (National Institutes of Health, USA). The “non-roundness” factors of Lyocell fibers with different cross-sectional shapes were calculated according to equation (1).

（1）

whereis the non-roundness factor (dimensionless); is fiber circumference (m); and S is fiber cross-sectional area (m2). Thirty specimens were measured for each sample and the average value was calculated.

**References**

1. Zhang H., Shen Y., Edgar K. J., Yang G., Shao H. Influence of cross-section shape on structure and properties of Lyocell fibers. *Cellulose* 2021, *28*, 1191-1201.
